# Supplementary material for: Green renewable energy production from Myxosarcina sp.: media optimization and assessment of biodiesel fuel properties
Source: Royal Society of Chemistry journal article supplement (doi:10.1039/c5ra09372d), 2015-01-01
Supplement: c5ra09372d1.pdf [file c5ra09372d1.pdf]

### Annexure.1. GC-MS CHROMATOGRAM- INTERPRETATION FOR THE PEAKS OF THE SAMPLES:

**Samples:** MS-1 and XC-1 are sample codes for the FAME from *Myxosarcina* sp. for GC-MS analysis.

**Unidentified peaks:** Represented as NI- non identified peaks (Retention time – 10.7, 14.6, 15.12, 15.45, 17.82) (marked in the chromatogram attached below this document)

**NIIST Database matches:** Untransesterified fatty acids such as Octadecene and Eicosene, corresponding to the retention time of 13.77 and 15.88 respectively were also detected in the chromatogram (Mass spectrum data- Annexure. 3)

**#NOTE:** Hence both the retention time of Supelco standard and NIIST database were used to interpret the compounds. The following table reveals the interpretation of the peaks of the chromatogram of the sample.

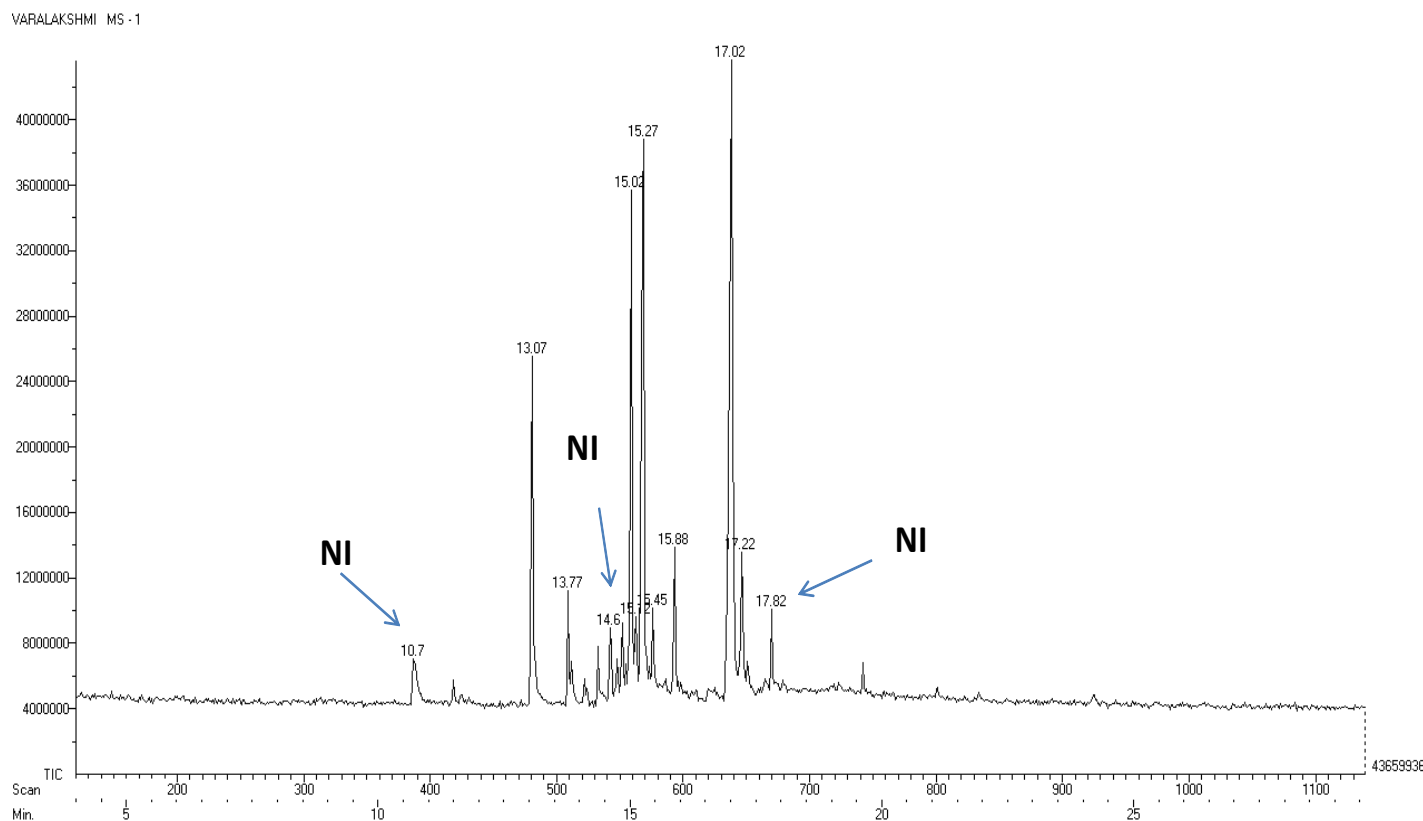

**Fig.1.** GC-MS chromatogram showing each peaks and NI denotes non identified peaks

**Table.1.** Retention times,  $m/z$  value, carbon number and identification of each peak by comparing with NIST database and Supelco standard.

| Retention time | Compound                       | $m/z$ | Carbon no. | Compared to               |
|----------------|--------------------------------|-------|------------|---------------------------|
| 10.7           | NI                             | NI    | NI         | NI                        |
| 13.0           | Methyl tetradecanoate          | 242   | C14:0      | Both Supelco and database |
| 13.77          | 3 - Octadecene                 | 252   | C18:1      | NIST database             |
| 14.6           | NI                             | NI    | NI         | NI                        |
| 15.02          | Hexadecenoic acid methyl ester | 268   | C16:1      | Supelco standard          |
| 15.27          | Hexadecanoic acid methyl ester | 270   | C16:0      | Both Supelco and database |
| 15.88          | 9- Eicosene                    | 280   | C20:2      | NIST database             |
| 17.02          | 8 - Octadecenoic methyl ester  | 296   | C18:1      | Both Supelco and database |
| 17.22          | Octadecanoic methyl ester      | 298   | C18:0      | Both Supelco and database |
| 17.82          | NI                             | NI    | NI         | NI                        |

**Table.2.** Properties of sugar industry waste (SIW).

| Parameters                   | Values                    |
|------------------------------|---------------------------|
| Total dissolved solids (TDS) | 860 $\pm$ 20 mg /ml SIW   |
| Reducing sugars              | 4.1 $\pm$ 0.03 mg/ml SIW  |
| Protein                      | 16.1 $\pm$ 0.01 mg/ml SIW |
| pH                           | 5.12                      |

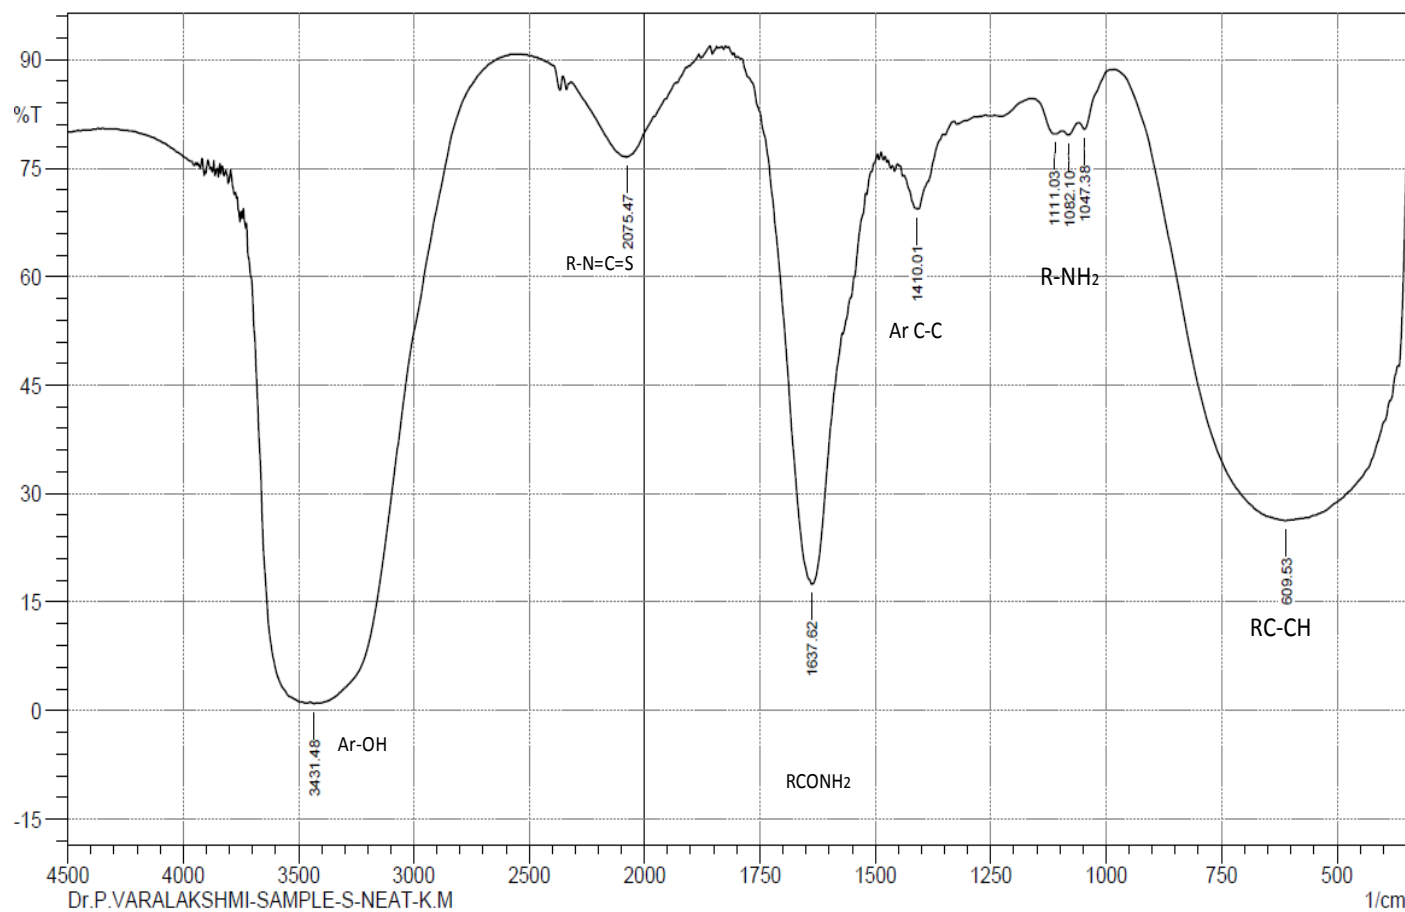

| No. | Peak    | Intensity | Corr. Intensity | Base (H) | Base (L) | Area   | Corr. Area |
|-----|---------|-----------|-----------------|----------|----------|--------|------------|
| 1   | 609.53  | 26.268    | 0.441           | 650.03   | 576.74   | 42.311 | 0.303      |
| 2   | 1047.38 | 80.404    | 2.032           | 1058.96  | 983.73   | 5.357  | 0.008      |
| 3   | 1082.1  | 79.581    | 0.994           | 1095.6   | 1058.96  | 3.499  | 0.091      |
| 4   | 1111.03 | 79.709    | 1.472           | 1163.11  | 1095.6   | 5.84   | 0.155      |
| 5   | 1410.01 | 69.357    | 6.573           | 1438.94  | 1352.14  | 11.632 | 1.691      |
| 6   | 1637.62 | 17.461    | 46.171          | 1790     | 1572.04  | 76.386 | 40.726     |
| 7   | 2075.47 | 76.545    | 0.284           | 2079.33  | 1955.88  | 12.405 | 0.764      |
| 8   | 3431.48 | 0.959     | 0.141           | 3448.84  | 3421.83  | 53.654 | 0.86       |

Fig.2. FT-IR analysis of SIW sample with evidence of organic nitrogen and carbon compounds (Shakambari Ganeshan *et al.*, 2015).

## Reference:

1. John Coates. *Encyclopedia of Analytical Chemistry*, 2000. Interpretation of Infrared Spectra, A Practical Approach. R.A. Meyers (Ed.). pp. 10815–10837. Ó John Wiley & Sons Ltd, Chichester

2. Shakambari Ganeshan, Sumi M Babu, Ashokkumar Balasubramaniam, Palanivelu Peramachi and Varalakshmi Perumal. Industrial effluent as a substrate for glutaminase free L-asparaginase production from *Pseudomonas plecoglossicida* strain RS1; media optimization, enzyme purification and its characterization, RSC Advances, 2015, DOI: 10.1039/C5RA05507E.
